# Supplementary material for: A supramolecular polymeric heterojunction composed of an all-carbon conjugated polymer and fullerenes
Source: Royal Society of Chemistry journal article supplement (doi:10.1039/d1sc03410c), 2021-01-01
Supplement: d1sc03410c1.pdf [file d1sc03410c1.pdf]

## Supplementary Information

### **A Supramolecular Polymeric Heterojunction Composed of All-Carbon Conjugated Polymer and Fullerenes**

Shengda Wang,<sup>a</sup> Xingcheng Li,<sup>a</sup> Xinyu Zhang,<sup>a</sup> Pingsen Huang,<sup>a</sup> Pengwei Fang,<sup>a</sup>  
Junhui Wang,<sup>\*b</sup> Shangfeng Yang<sup>\*a</sup>, Kaifeng Wu,<sup>b</sup> Pingwu Du<sup>\*a</sup>

<sup>a</sup>Hefei National Laboratory for Physical Sciences at the Microscale, *iChEM* (Collaborative Innovation Center of Chemistry for Energy Materials), CAS Key Laboratory of Materials for Energy Conversion, Department of Materials Science and Engineering, University of Science and Technology of China, 96 Jinzhai Road, Hefei, Anhui Province, 230026, China

<sup>b</sup>State Key Laboratory of Molecular Reaction Dynamics and Dynamics Research Center for Energy and Environmental Materials, Dalian Institute of Chemical Physics, Chinese Academy of Sciences, Dalian, Liaoning 116023, P. R. China

\*Corresponding author: [dupingwu@ustc.edu.cn](mailto:dupingwu@ustc.edu.cn); [wjh@dicp.ac.cn](mailto:wjh@dicp.ac.cn);  
[sfyang@ustc.edu.cn](mailto:sfyang@ustc.edu.cn)

Tel/Fax: 86-551-63606207

## Table of Contents

|                                                                         |               |
|-------------------------------------------------------------------------|---------------|
| <b>1. General Methods and Apparatus .....</b>                           | <b>S3</b>     |
| <b>2. Synthetic Procedures .....</b>                                    | <b>S4-S6</b>  |
| <b>3. Methods for STM Measurements .....</b>                            | <b>S7</b>     |
| <b>4. Physical characterizations and photophysical properties .....</b> | <b>S8-S32</b> |
| <b>5. References .....</b>                                              | <b>S33</b>    |

## 1. General Methods and Apparatus

NMR spectra were recorded on Bruker BioSpin ( $^1\text{H}$  400 MHz,  $^{13}\text{C}$  100 MHz) spectrometer. Chemical shifts for  $^1\text{H}$  NMR are expressed in parts per million (ppm) relative to  $\text{CDCl}_3$  ( $\delta$  7.26 ppm). High resolution mass spectrometry (HR-MS) analyses were carried out using MALDI-TOF-MS techniques. Data were reported as follows: chemical shift, multiplicity (s = singlet, d = doublet, t = triplet, m = multiplet, br = broad signal), coupling constant (Hz), and integration. Samples were characterized with Raman spectroscopy (RM3000, Renishaw, UK) and Infrared spectroscopy (IR, FTS-7000, Varian, USA). UV-vis absorption spectra were performed on a UNIC-3802 spectrophotometer. All solvents for syntheses were dried by distillation under nitrogen prior to use tetrahydrofuran (THF) and 1,4-dioxane were distilled after reflux with sodium). Other chemicals were obtained from commercial suppliers (Innochem or Acros). Air-sensitive reactions were all carried out under argon. The molecular weight distribution, relative number-average and weight-average molecular weights were determined at 40 °C by gel permeation chromatography (GPC, Waters 1525) equipped with a refractive index detector (Waters 2414) and Agilent PLgel 5  $\mu\text{m}$  MIXED-C column with the eluent at 1.0 mL/min. The calibration was built on polystyrene standards. Analytical thin-layer chromatographies (TLC) were performed with silica gel HSGF 254. Flash chromatography was performed on silica gel (300~400 mesh).

## 2. Synthetic procedures

### Synthesis of compound 2',5'-dibromo-4,4''-dichloro-1,1':4',1''-terphenyl (1).

2',5'-dibromo-4,4''-dichloro-1,1':4',1''-terphenyl was prepared according to the published procedures.<sup>S1</sup>

### Synthesis of compound 2,2'-(2',5'-bis(4-chlorophenyl)-[1,1':4',1''-terphenyl]-4,4''-diyl)bis(4,4,5,5-tetramethyl-1,3,2-dioxaborolane) (2).

To a mixture of 3 (2.2 g, 4.8 mmol) and 1,4-bis(4,4,5,5-tetramethyl-1,3,2-dioxaborolan-2-yl)benzene (8.3 g, 33.8 mmol) dispersed in 1,4-dioxane (30 mL), ethanol (15 mL), and deionized water (15 mL) in a round-bottom flask (250 mL), then degassed for 15 minutes by bubbling Ar through the solution. To the mixture were added tetrakis(triphenylphosphine)palladium (100 mg, 0.09 mmol) and Na<sub>2</sub>CO<sub>3</sub> (5.1 g, 48.0 mmol), which was further purged with Ar for another 15 minutes. Thereafter, the mixture was then stirred at 80 °C for 36 h, the reaction was quenched with methanol (10 mL). The crude product was recrystallization from CH<sub>2</sub>Cl<sub>2</sub>/MeOH to afford 4 as white solid (2.03 g, 60%). <sup>1</sup>H NMR (CDCl<sub>3</sub>, 400 MHz): δ (ppm) 7.70 (d, J = 7.6 Hz, 4H), 7.46 (s, 2H), 7.20 (d, J = 7.8 Hz, 8H), 7.12 (d, J = 8.2 Hz, 4H), 1.35 (s, 24H). <sup>13</sup>C NMR (CDCl<sub>3</sub>, 100 MHz): δ (ppm) 143.30, 139.80, 139.09, 138.74, 134.60, 132.94, 132.87, 131.10, 129.19, 128.35, 83.88, 24.91. HR-MS (MALDI-TOF) *m/z* calcd. for C<sub>42</sub>H<sub>42</sub>B<sub>2</sub>Cl<sub>2</sub>O<sub>4</sub> [Ag]<sup>+</sup>: 809.1698, found: 809.1634

### Synthesis of compound 4.

To a degassed suspension of 3<sup>S2</sup> (163.32 mg, 0.2 mmol), 2 (130.72 mg, 0.19 mmol), and KOH (134 mg, 2.39 mmol) in THF (250 mL) and H<sub>2</sub>O (10 mL) was added

Pd(PPh<sub>3</sub>)<sub>4</sub> (30 mg, 0.026 mmol), then the mixture was degassed for 20 min. Then the mixture was heated up to 77 °C for 48 h under nitrogen atmosphere. After cooling down to room temperature, water was added and the mixture was extracted with DCM. The combined organic layer was dried over anhydrous MgSO<sub>4</sub>, filtered and concentrated under reduced pressure to afford crude product 6 as a white solid for the next step without further purification.

### Synthesis of compound 5.

To a 50-mL round-bottom flask (vessel A) containing a magnetic stirring bar were added SnCl<sub>2</sub>·2H<sub>2</sub>O (274 mg, 1.21 mmol), THF (25 mL) and concentrated HCl/H<sub>2</sub>O (0.21 mL, 12 mol/L) were added, and the resultant mixture was further stirred at room temperature for 30 min. To another 200-mL round-bottom flask (vessel B) containing a magnetic stirring bar were added the above crude product 6 and dry THF (10 mL). A solution of H<sub>2</sub>SnCl<sub>4</sub>/THF (18 mL, 0.72 mmol, 0.04 M in THF) in vessel A was added. After stirring the mixture at room temperature for 2 h, the mixture was quenched with aqueous sodium hydroxide, extracted with CH<sub>2</sub>Cl<sub>2</sub>, dried over Na<sub>2</sub>SO<sub>4</sub>, and concentrated under reduced pressure. The crude product was purified by column chromatography (hexane/CH<sub>2</sub>Cl<sub>2</sub> = 4/1) to afford compound 5 (18.2 mg, ~10% over two steps) as a pale yellow solid. <sup>1</sup>H NMR (CDCl<sub>3</sub>, 400 MHz): δ 7.63-7.52 (m, 24H), 7.42 (d, J = 8.5 Hz, 4H), 7.35 (s, 2H), 7.28 (d, J = 8.4 Hz, 4H), 7.21 (d, J = 8.3 Hz, 4H), 7.11 (dd, J = 8.4, 6.9 Hz, 8H); <sup>13</sup>C NMR (100 MHz, CS<sub>2</sub>/CDCl<sub>3</sub> (1:1)): δ (ppm) 139.24, 138.87, 138.64, 138.55, 138.33, 138.24, 138.19, 138.16, 138.07, 138.05, 137.98, 137.80, 133.15, 132.74, 130.66, 130.31, 128.29, 127.67, 127.42, 127.36, 127.28,

127.19, 127.09. HR-MS (MALDI-TOF)  $m/z$  calcd. for  $C_{72}H_{46}Cl_2 [M]^+$ : 980.2977, found: 980.2923. IR (KBr)  $cm^{-1}$ : 3026, 2963, 2921, 2850, 2156, 1860, 1688, 1586, 1476, 1340, 1095, 813, 757. Raman spectra ( $cm^{-1}$ ): 1203, 1275, 1597.

### Synthesis of SPh.

To a mixture of compound **5** (64 mg, 65.0  $\mu$ mol), 2,2'-bipyridyl (119 mg, 0.76 mmol), and 1,5-cyclooctadiene (94  $\mu$ L, 0.76 mmol) in a round-bottom flask (25 mL) was added anhydrous DMF (5 mL). The mixture was bubbled with Ar for 0.5 h before bis(1,5-cyclooctadiene)nickel(0) (210 mg, 0.763 mmol) was added in one portion. Thereafter, the mixture was heated up to reflux for 120 h to give a deep purple suspension. Upon cooling to room temperature, the solvent was removed by rotary evaporator. The resulting precipitate was filtered, washed intensively with 0.5 M HCl solution in water, and saturated EDTA solution methanol, filtered and washed with water, methanol, acetone, methanol, and hexane. The precipitate was collected, giving 40 mg of polymer **SPh** as a yellow solid (yield: 67%):  $M_n = 10768 \text{ g}\cdot\text{mol}^{-1}$ ,  $M_w = 28655 \text{ g}\cdot\text{mol}^{-1}$  by GPC. IR (KBr)  $cm^{-1}$ : 2963, 2913, 2853, 1413, 1260, 1093, 1017, 800, 706. Raman spectra ( $cm^{-1}$ ): 1206, 1276, 1600.

### 3. Methods for STM measurements

Drop casting method: STM experiments were performed using Createc LT-STM in an UHV chamber with base pressure of  $1 \times 10^{-10}$  mbar. Atomically flat Au(111) single crystal was used as the substrate which was cleaned by repeated cycles of Ar<sup>+</sup> sputtering (2 keV) and annealing at 700 K for 10 min. The sample was then deposited onto the freshly-prepared Au(111) surface by casting a small drop ( $\sim 2$   $\mu$ L) of the solution in CH<sub>2</sub>Cl<sub>2</sub> ( $1 \times 10^{-4}$  M) and then transferred back into the UHV chamber immediately after the solvent evaporated. Before subjected to scanning, the sample was further annealed at  $\sim 400$  K for 15 min in order to desorb the contaminations possibly introduced from the solution. Related STM images (Figures 3e and 3f) were acquired at liquid-nitrogen temperature using an electrochemically etched gold tip in the constant-current mode.

## 4. Physical characterizations and photophysical properties

### Photophysical studies

UV-Vis absorption spectra of **SPh** and compound **5** were performed on a UNIC-3802 spectrophotometer at room temperature. The fluorescent emission experiments were performed on a Fluoromax-4 spectrofluorometer at room temperature and the fluorescence spectra of **SPh** and compound **5** were collected under an excitation wavelength at 320 nm and 300 nm, respectively. The fluorescent time-resolved decays were measured on a Mini-tau spectrometer (Edinburgh, U.K.) using time-correlated single-photon counting technique (TCSPC). The sample was excited at 390 nm with a picosecond pulsed diode laser (EPL-390, Edinburgh, U.K.) triggered at 5 MHz repetition rate. The emission was detected at 469 nm. The detected fluorescence intensity decays were analyzed using a monoexponential model. The measurements were performed at least twice for consistency. **SPh** and compound **5** were measured in CH<sub>2</sub>Cl<sub>2</sub> with a concentration of 0.1 mg·mL<sup>-1</sup> and 1.0 × 10<sup>-5</sup> M, respectively.

**Fluorescence quenching experiment.** To a solution of compound **5** (8.33 × 10<sup>-6</sup> mol·L<sup>-1</sup>) were titrated by C<sub>60</sub> (2.50 × 10<sup>-5</sup> mol·L<sup>-1</sup>) in toluene at room temperature. The changes in the fluorescent intensity of compound **5** at different ratios between them were recorded. The *K<sub>a</sub>* was determined by the equation<sup>S3-S5</sup>:  $F/F_0 = (1 + (k_f/k_s)K_a[C_{60}]) / (1 + K_a[C_{60}])$ . *F*, *F*<sub>0</sub>, *k<sub>f</sub>*, *k<sub>s</sub>*, *K<sub>a</sub>*, [*C*<sub>60</sub>] are fluorescence intensity, fluorescence of compound **5** before the addition of C<sub>60</sub>, a proportionality constant of the complex, a proportionality constant of the host, the binding constant, and the concentration of C<sub>60</sub>, respectively. A solution of **SPh** (1.67 × 10<sup>-3</sup> mg·mL<sup>-1</sup>) were titrated by C<sub>60</sub> (from 0.0 to 5.50 × 10<sup>-6</sup> mol·L<sup>-1</sup>



<sup>1</sup>) in toluene at room temperature. The changes in the fluorescent intensity of **SPh** at different ratios between them were recorded.

**UV-vis Titrations.** To a solution of **SPh** ( $1.67 \times 10^{-3} \text{ mg} \cdot \text{mL}^{-1}$ ) were titrated by  $\text{C}_{60}$  (from 0.0 to  $5.50 \times 10^{-6} \text{ mol} \cdot \text{L}^{-1}$ ) in toluene at room temperature. The resulting solutions were measured by UV-vis spectroscopy at room temperature. These spectra were corrected with background subtraction. <sup>S6</sup>

## 5. SCLC measurements.

Electron-only devices (ITO/ZnO/Active layer/Ca/Al) were fabricated as follows: 0.1 M zinc acetate in a solution mixture of 2-methoxy ethanol and ethanolamine was spin-coated onto the ITO substrates at 3000 rpm for 30 s, followed by heating at 200 °C for 30 min in air to form a ZnO film. The o-dichlorobenzene solution of C<sub>60</sub> (4 mg/mL), **SPh** (4 mg/mL), **SPh** in the presence of C<sub>60</sub> (4 mg/mL) were spin-coated onto the ZnO layer at 1000 rpm for 40s, respectively. Then the devices were annealed at 125 °C for 10 min. Finally, 10 nm Ca/80 nm Al was deposited sequentially atop the active layer in a vacuum chamber ( $\sim 10^{-5}$  Pa) with a defined active area of  $2 \times 5$  mm<sup>2</sup>.

Hole-only devices (ITO/PEDOT: PSS/Active layer /MoO<sub>3</sub>/Ag) were fabricated as follows: ITO was treated in an ultraviolet-ozone chamber for 15 min. Then PEDOT: PSS samples were spin-coated onto the ITO substrates at 3500 rpm for 40 s and was heated at 150 °C for 15 min. The o-dichlorobenzene solution of C<sub>60</sub> (4 mg/mL), **SPh** (4 mg/mL), **SPh** in the presence of C<sub>60</sub> (4 mg/mL) were spin-coated onto the PEDOT: PSS layers at 1000 rpm for 40s, and the devices were annealed at 125 °C for 10 min. Finally, 8 nm Ca/80 nm Ag was deposited atop the **SPh** layer in a vacuum chamber ( $\approx 10^{-5}$  Torr). The current density-voltage ( $J$ - $V$ ) characterization of the devices were carried out by using a Keithley 2400 source measurement. The thickness of samples is 50 nm, which was measured by using a KLA-Tencor P6 surface profilometer.

The  $\mu_e / \mu_h$  value is calculated from Mott-Gurney equation (1):

$$J_{SCLC} = \frac{9}{8} \varepsilon_0 \varepsilon_r \mu_{\text{eh}} \left( \frac{V^2}{L^3} \right) \quad (1)$$

where  $J_{SCLC}$  stands for current density,  $V$  is the applied potential,  $L$  is the thickness of the C<sub>60</sub> (50 nm), **SPh** (50 nm), **SPh** with C<sub>60</sub> (50 nm),  $\varepsilon_r$  is the relative dielectric constant of the blend,  $\varepsilon_0$  is the permittivity of free space ( $8.85 \times 10^{-12} \text{ C V}^{-1} \text{ s}^{-1}$ ).

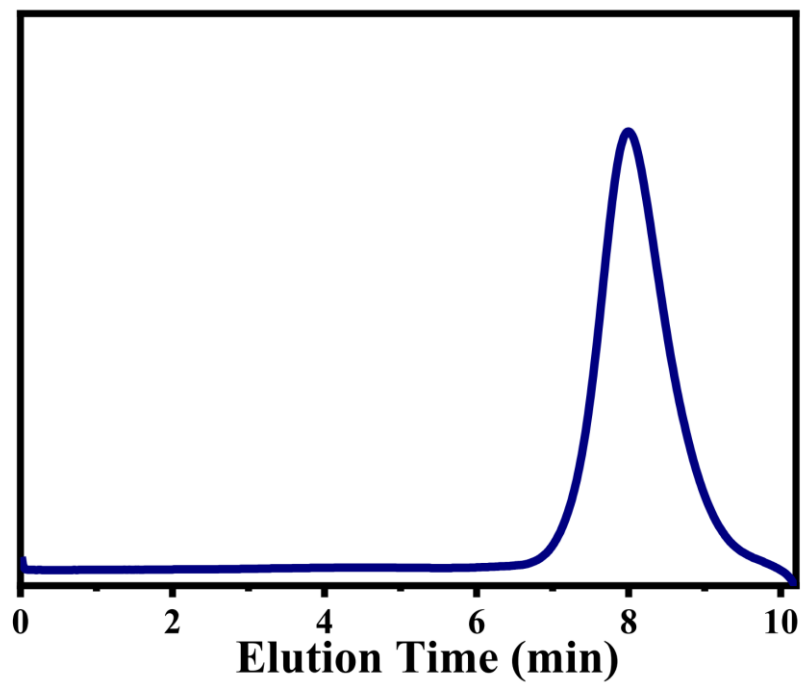

**Figure S1.** GPC trace of **SPh** using  $\text{CHCl}_3$  as the solvent.

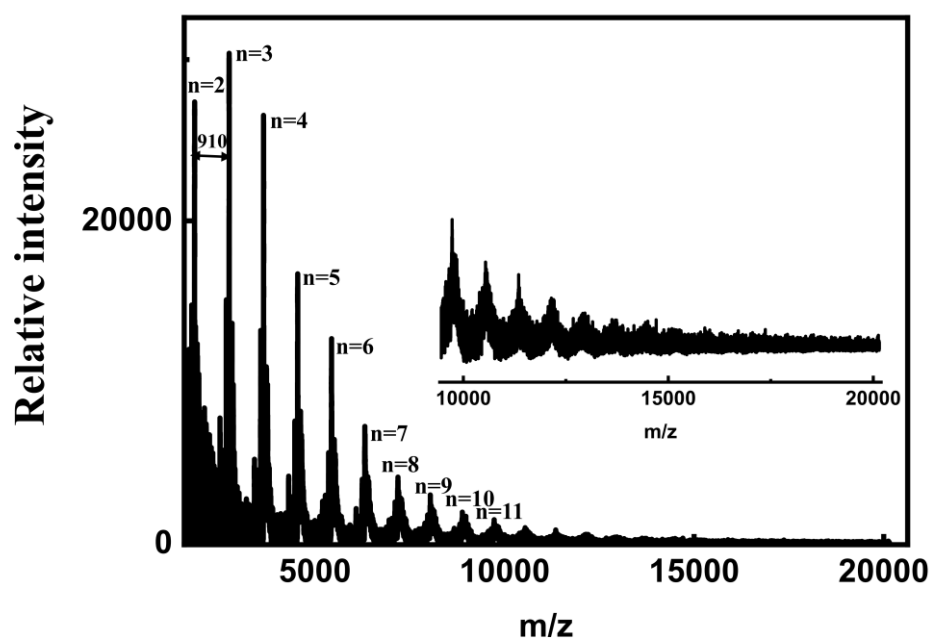

**Figure S2.** MALDI-TOF-MS spectrum for SPh.

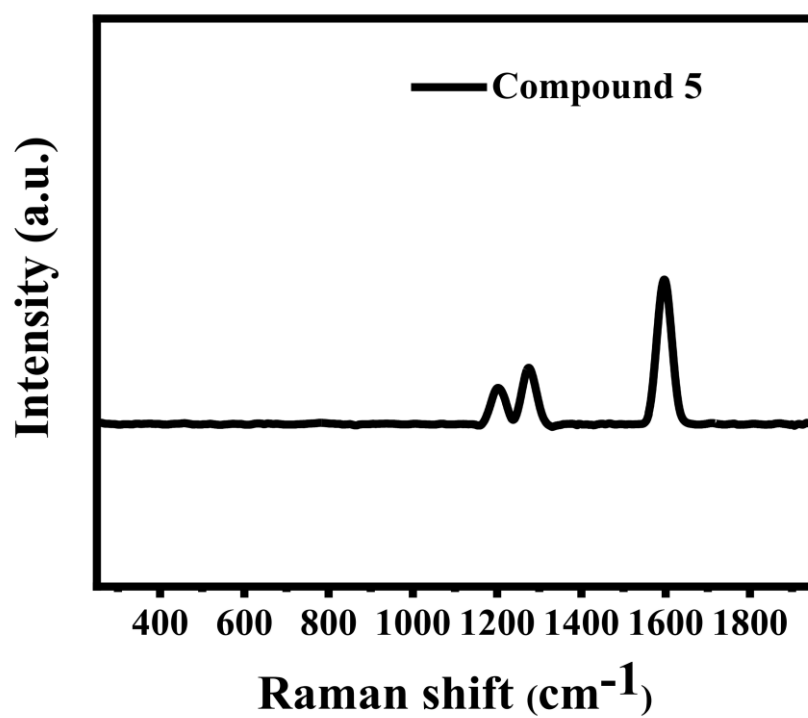

Figure S3. Raman spectra (excited at 785 nm) of compound 5.

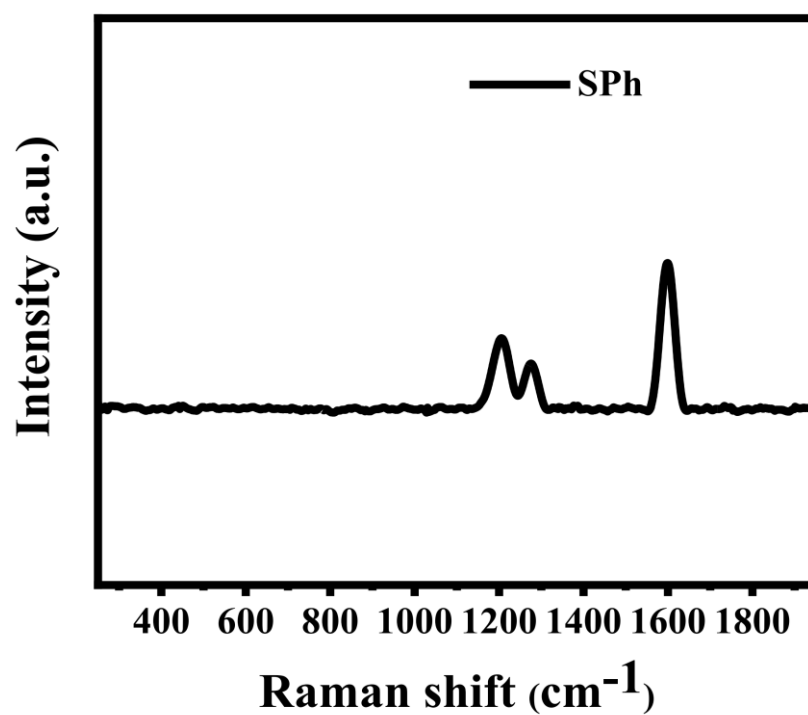

Figure S4. Raman spectra (excited at 785 nm) of SPh.

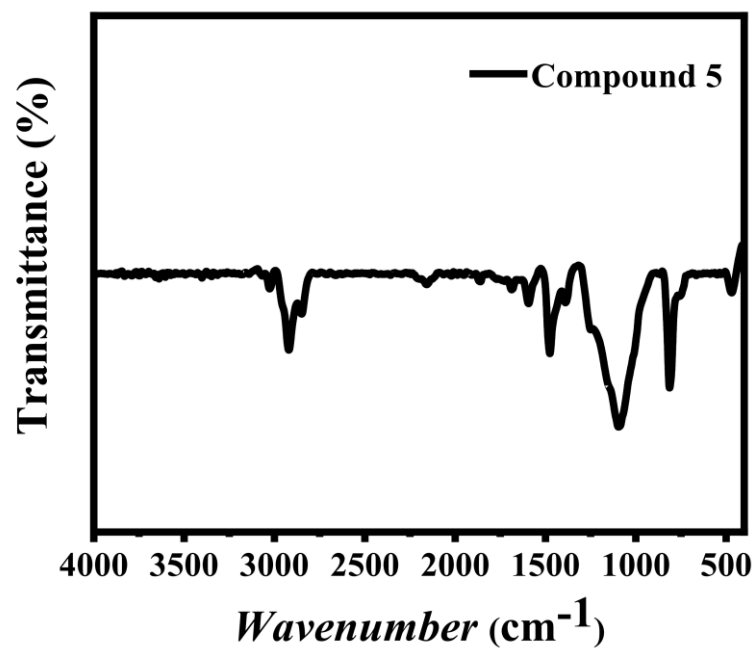

Figure S5. FTIR spectra of compound 5.

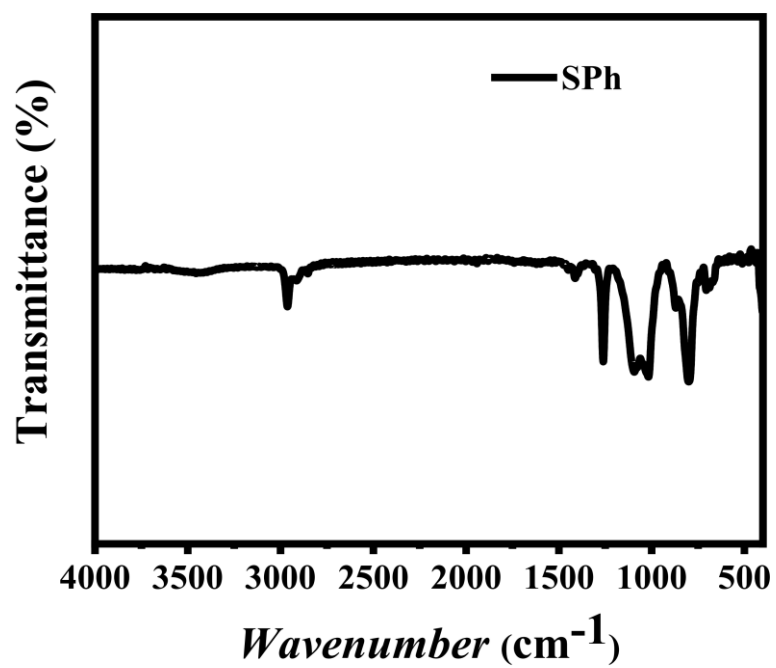

Figure S6. FTIR spectrum of SPh.

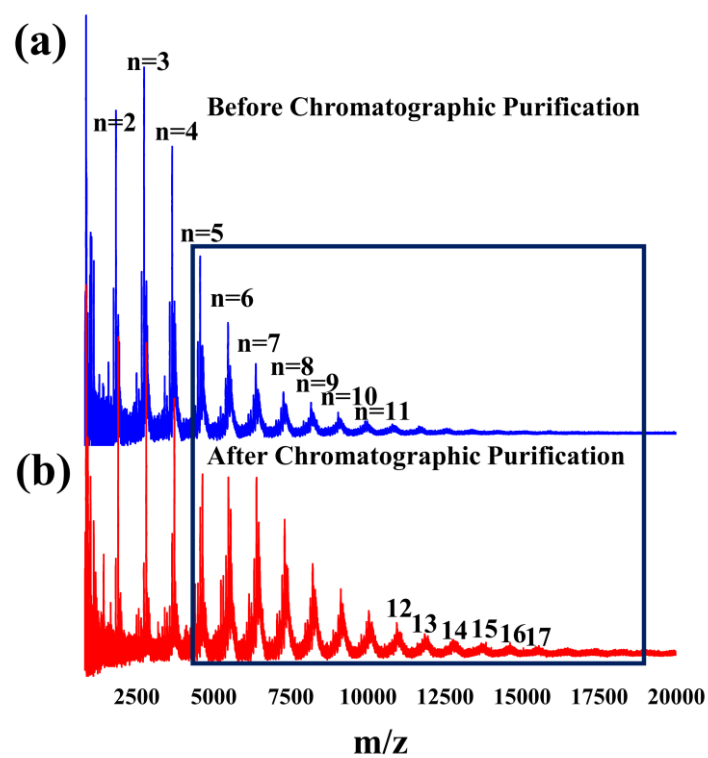

**Figure S7.** MALDI-TOF spectra of **SPh** before (a) and after (b) chromatographic purification.



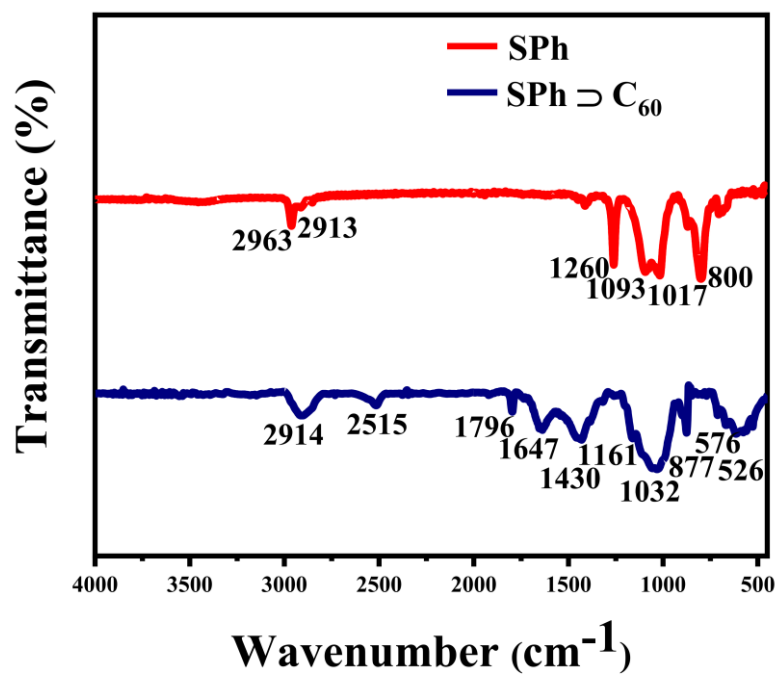

Figure S8. FTIR spectra of SPh (red) and SPh ⊃ C<sub>60</sub> (navy).

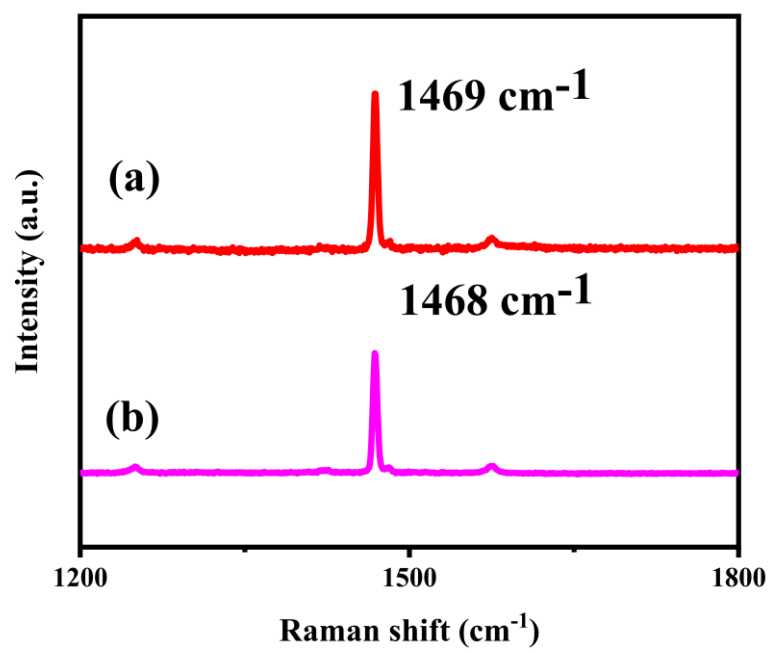

**Figure S9.** Raman spectra of SPh-C<sub>60</sub> (a) and C<sub>60</sub> (b).

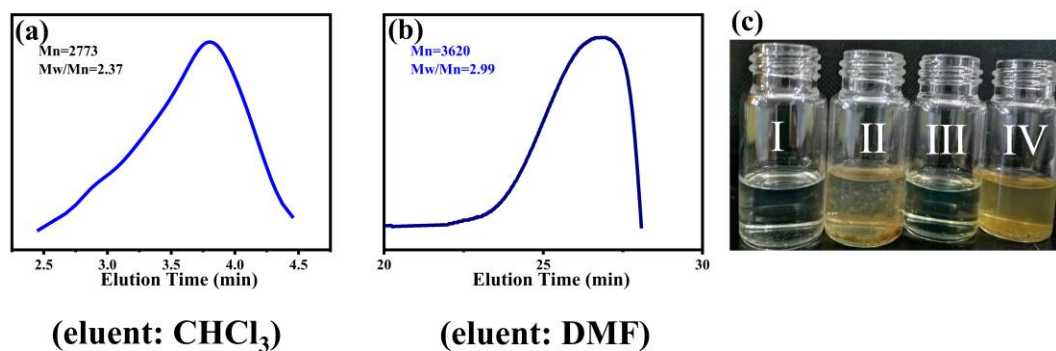

**Figure S10.** (a) GPC trace of **SPh**⊃**C**<sub>60</sub> (eluent: **CHCl**<sub>3</sub>). (b) GPC trace of **SPh**⊃**C**<sub>60</sub> (eluent: **DMF**). (c) Photographs of **SPH** dissolved in **CHCl**<sub>3</sub> (I), **SPh**⊃**C**<sub>60</sub> dissolved in **CHCl**<sub>3</sub> (II), **SPH** dissolved in **DMF** (III), **SPh**⊃**C**<sub>60</sub> dissolved in **DMF** (IV).

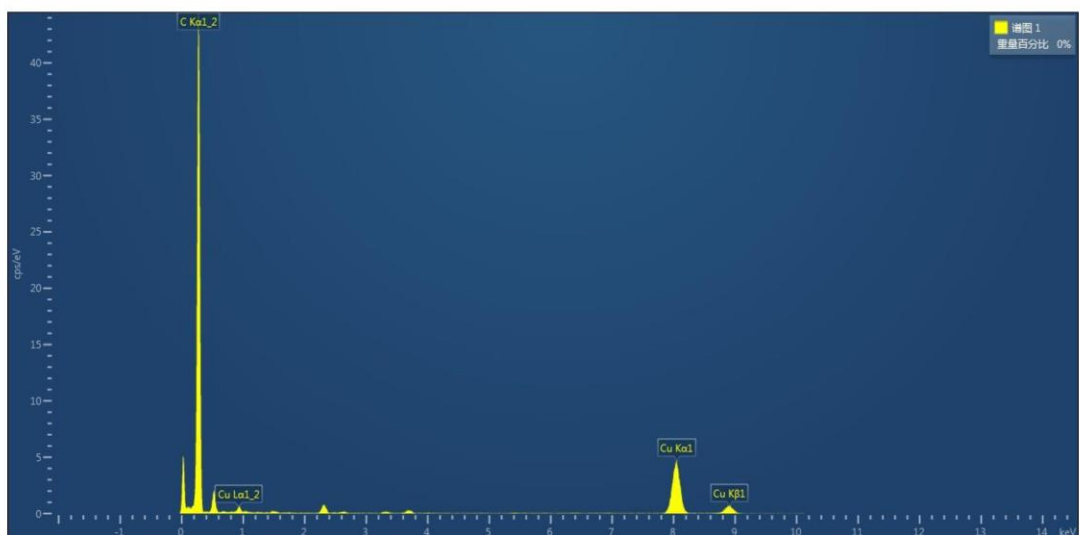

**Figure S11.** Electron microscopy energy-dispersive X-ray spectroscopy (EDS) mapping image of **SPh**.

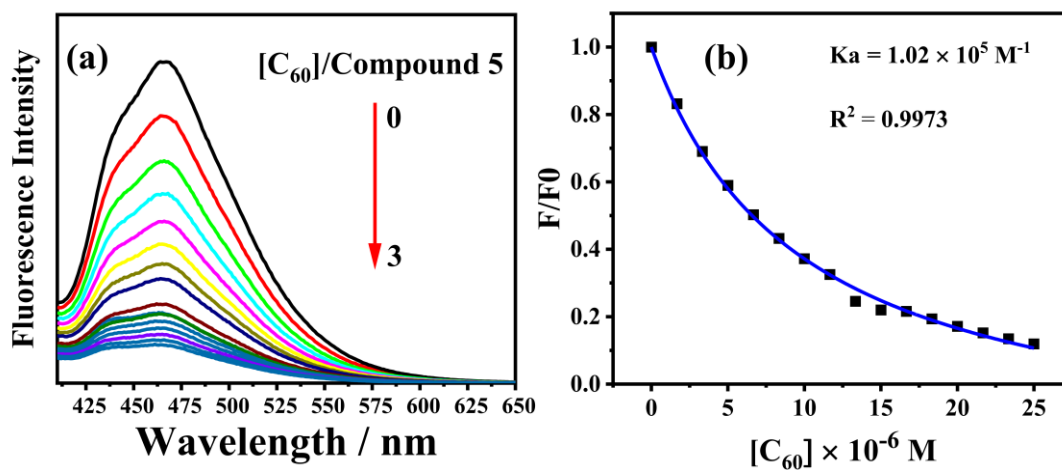

**Figure S12.** (a) Fluorescence spectra of compound **5** ( $8.33 \times 10^{-6} \text{ mol}\cdot\text{L}^{-1}$ ) titrated with  $\text{C}_{60}$  in toluene at room temperature. The concentrations of  $\text{C}_{60}$  are  $0.00 - 2.5 \times 10^{-5} \text{ mol}\cdot\text{L}^{-1}$  from the top to the bottom. (b) Correlation of  $[\text{C}_{60}]$  on the fluorescence intensity of compound **5** in toluene for calculating the  $K_a$ .  $R^2$  is the standard deviation.

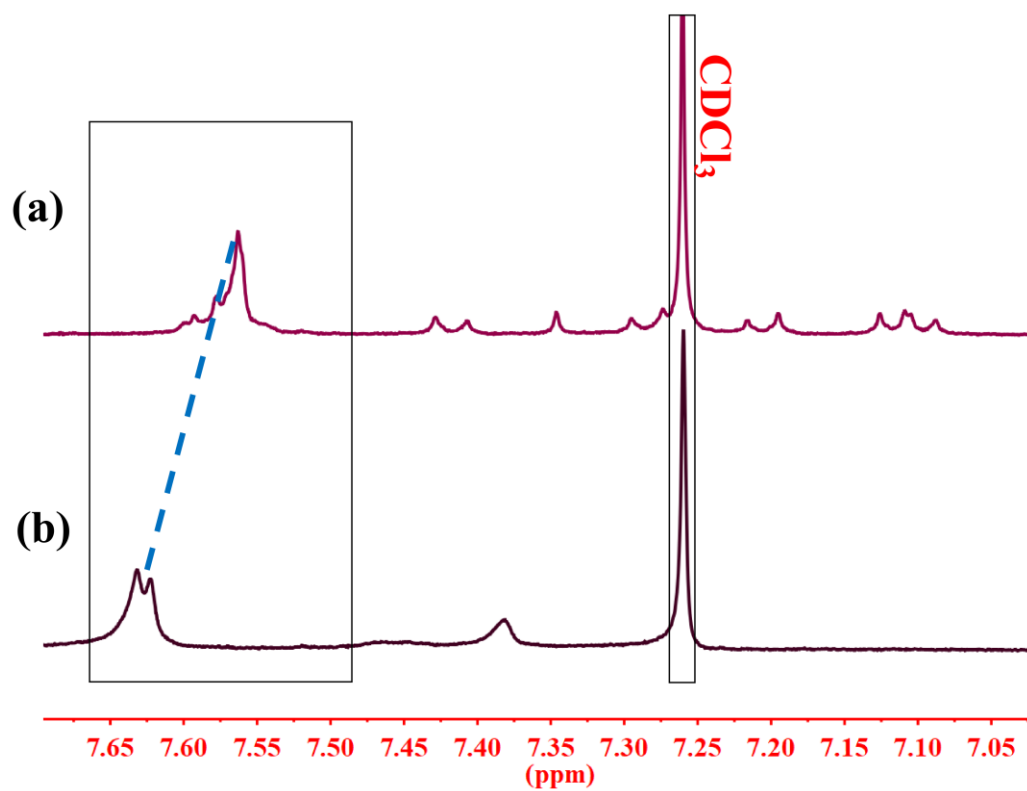

**Figure S13.** <sup>1</sup>H NMR spectra in CDCl<sub>3</sub> at room temperature of compound **5** before (a) and after (b) the addition of C<sub>60</sub>.

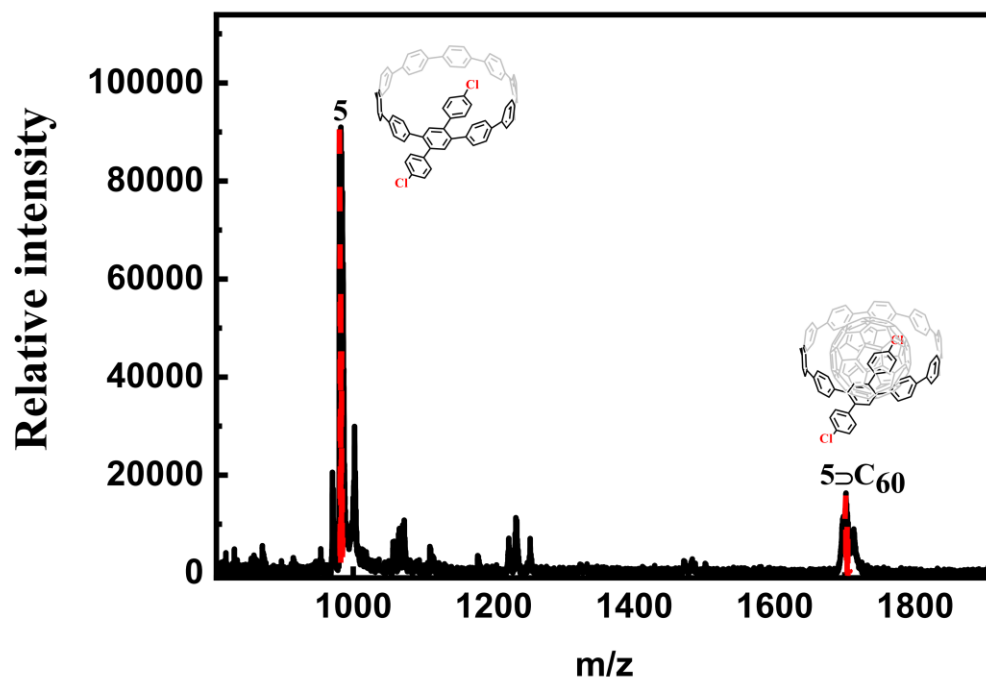

Figure S14. Mass spectrometry data for the compound 5-C<sub>60</sub> complex.

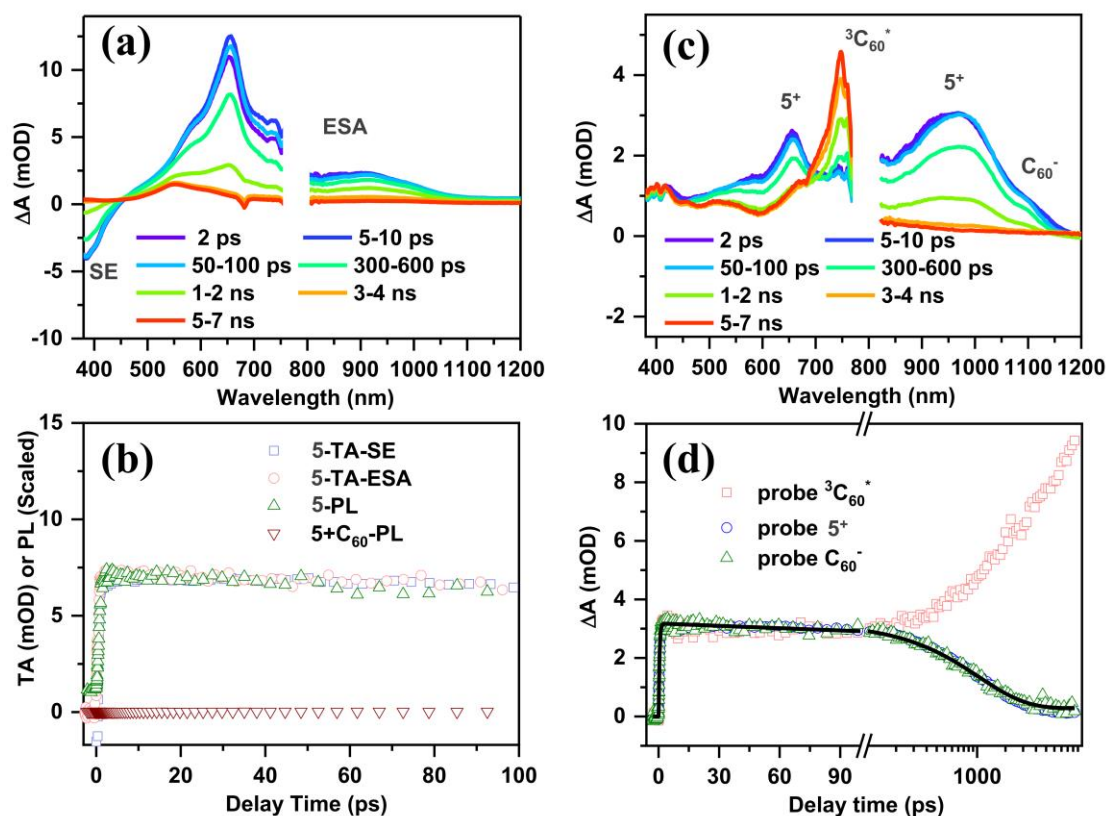

**Figure S15.** TA results for compound **5**. (a) TA spectra of compound **5** probed at indicated time delays following 350 nm excitation. The SE and ESA features of compound **5** are indicated. (b) Normalized FU kinetics (green triangles) and TA kinetics of compound **5** probed at SE (blue squares) and ESA (red circles) peaks. The FU kinetics of compound  $5 \rightarrow C_{60}$  is also shown with wine triangles. (c) TA spectra of compound  $5 \rightarrow C_{60}$  probed at indicated time delays following 350 nm excitation. The absorptions of compound  $5^+$ ,  ${}^3C_{60}^*$  and  $C_{60}^-$  are also indicated. (d) Normalized TA kinetics of compound  $5 \rightarrow C_{60}$  probed at the  ${}^3C_{60}^*$  (red squares), compound  $5^+$  (blue circles) and  $C_{60}^-$  (green triangles) and their fits (black line).



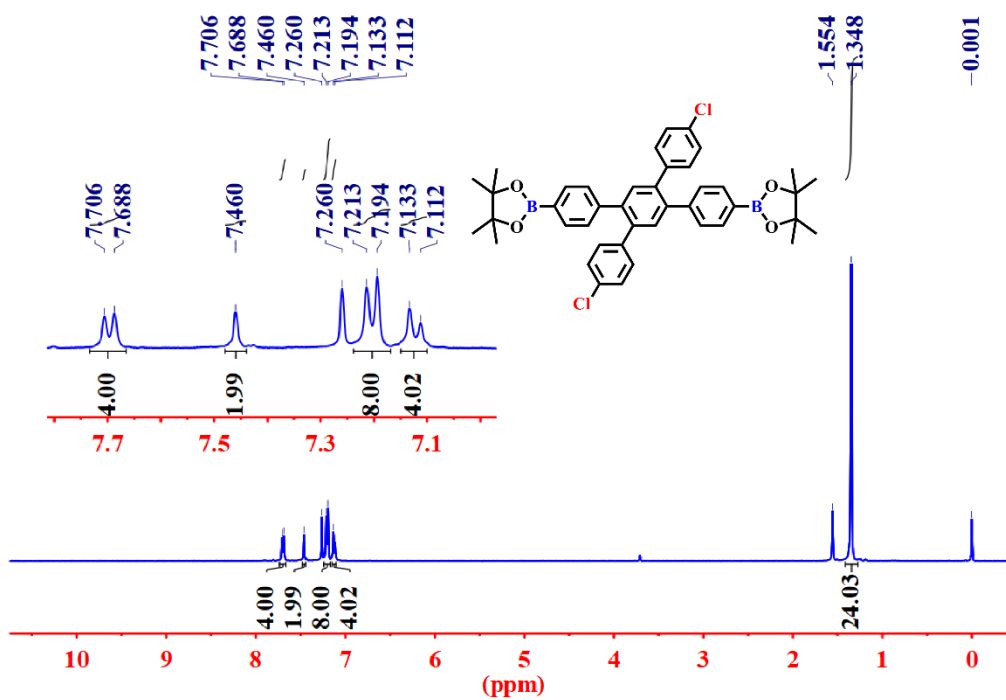

**Figure S16.**  $^1\text{H}$  NMR spectrum of compound **2** in  $\text{CDCl}_3$ .

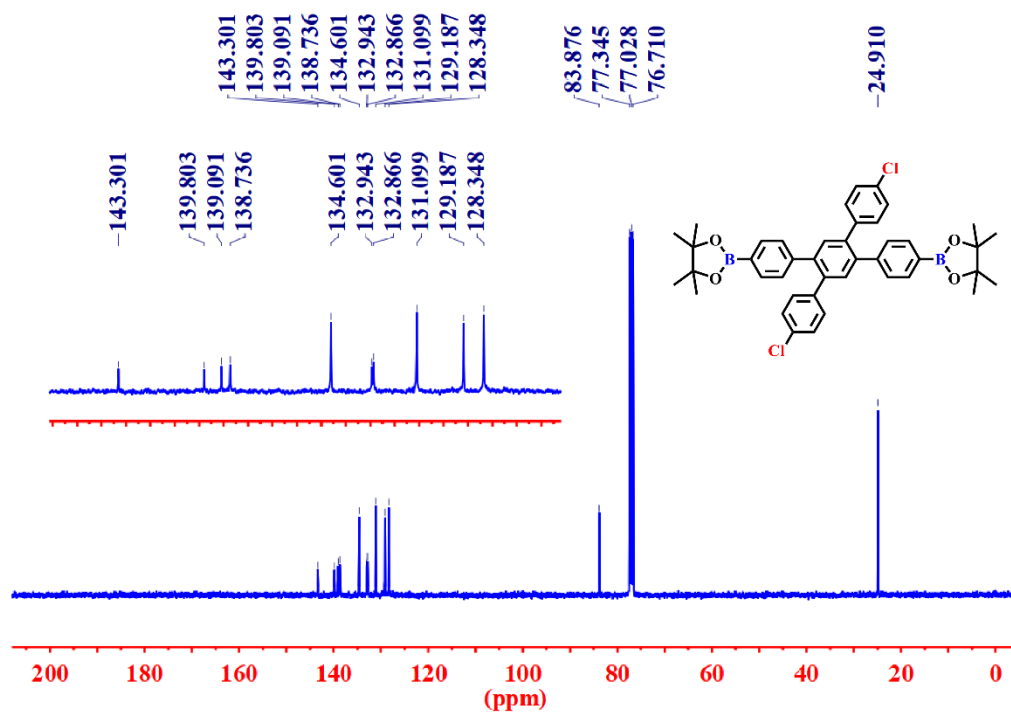

Figure S17.  $^{13}\text{C}$  NMR spectrum of compound **2** in  $\text{CDCl}_3$ .

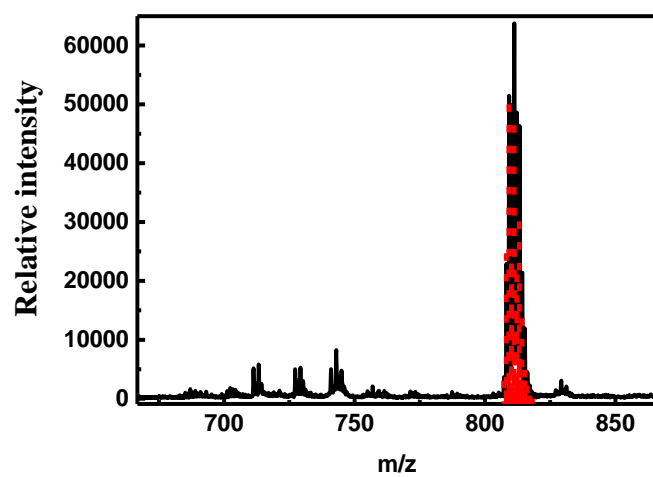

**Figure S18.** MALDI-TOF-MS spectrum (black) and simulated data (red) for compound **2**.

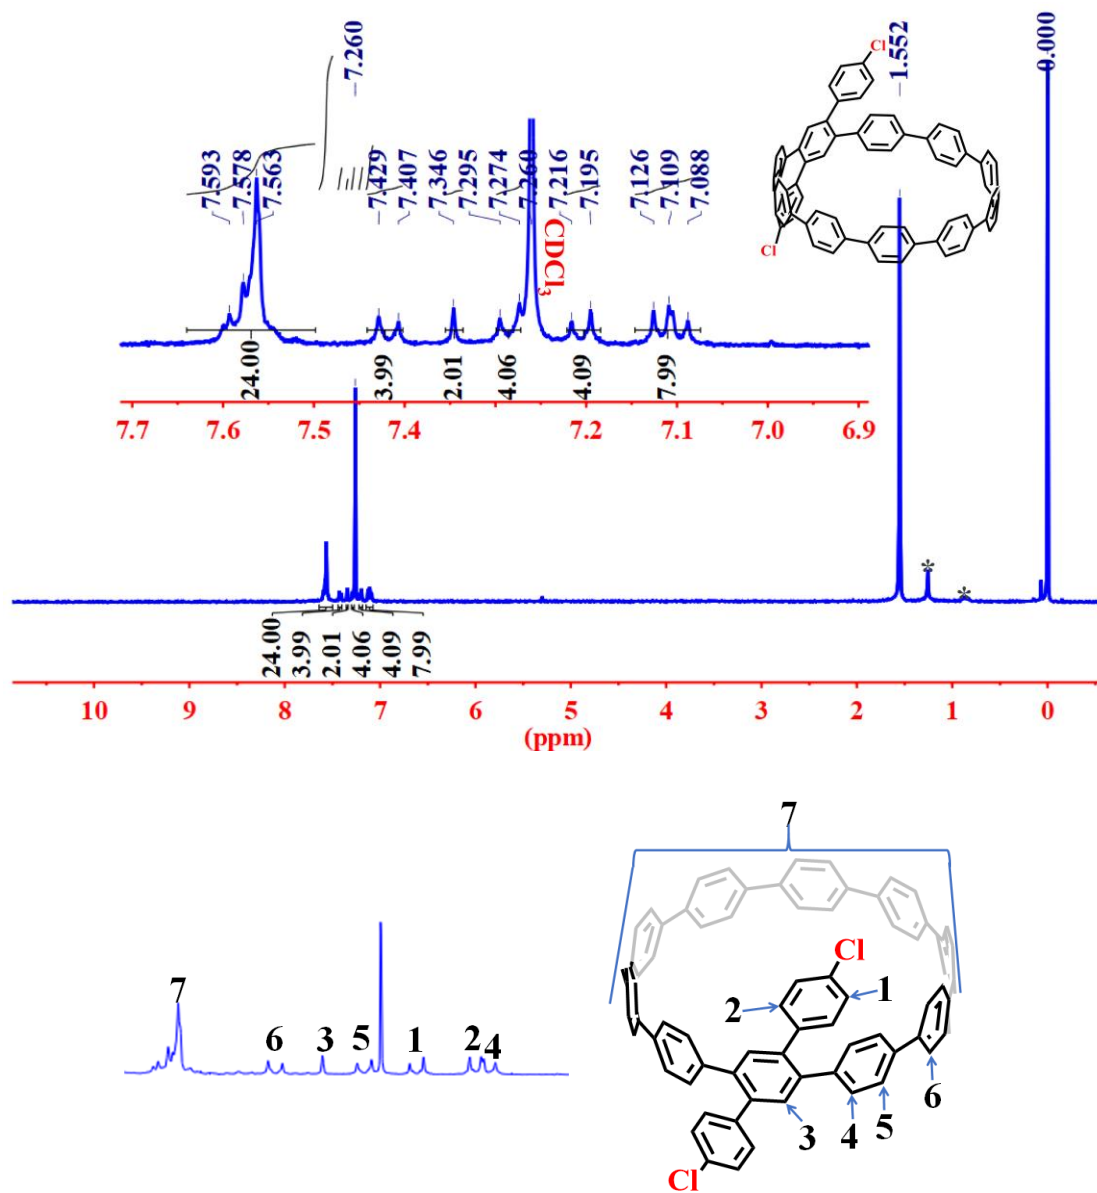

**Figure S19.**  $^1\text{H}$  NMR spectrum of compound **5** in  $\text{CDCl}_3$ . (\* grease residual signals).

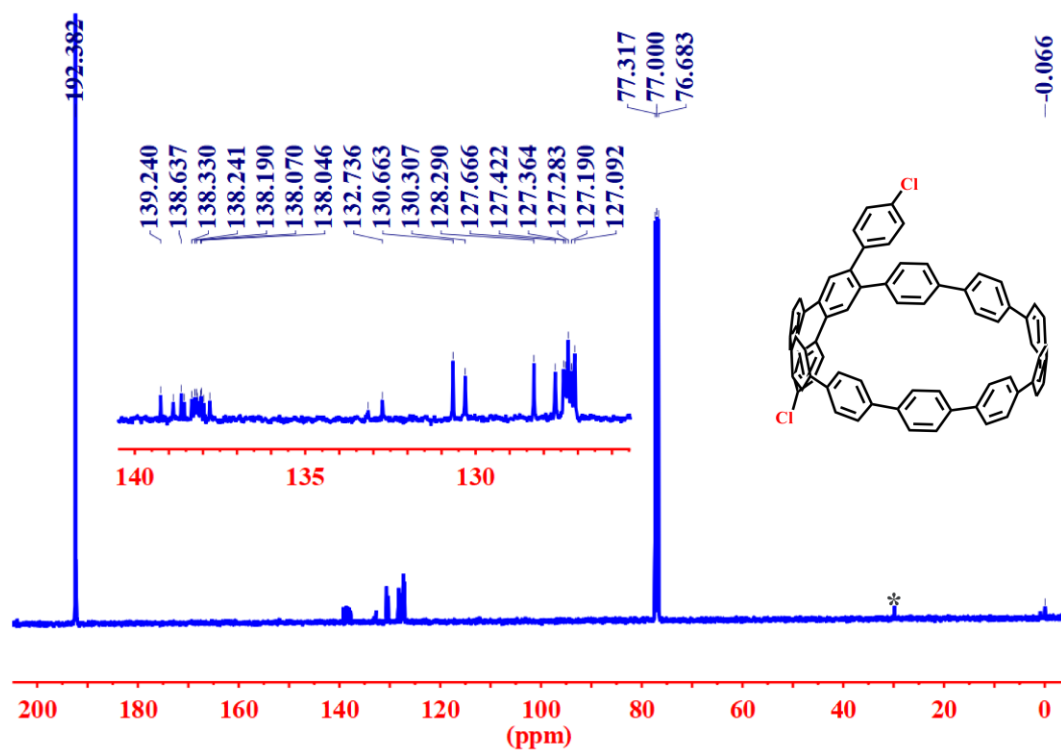

**Figure S20.**  $^{13}\text{C}$  NMR spectrum of compound **5** in  $\text{CS}_2/\text{CDCl}_3$  (1:1). (\* grease residual signals).

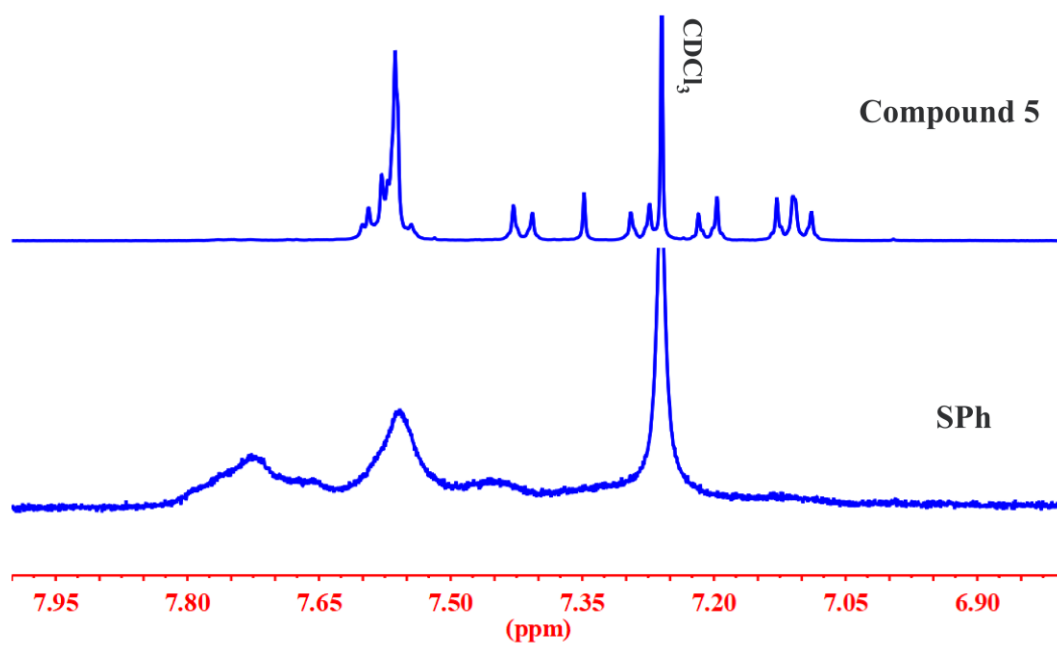

**Figure S21.** <sup>1</sup>H NMR spectra of **SPh** and compound **5** in CDCl<sub>3</sub>.

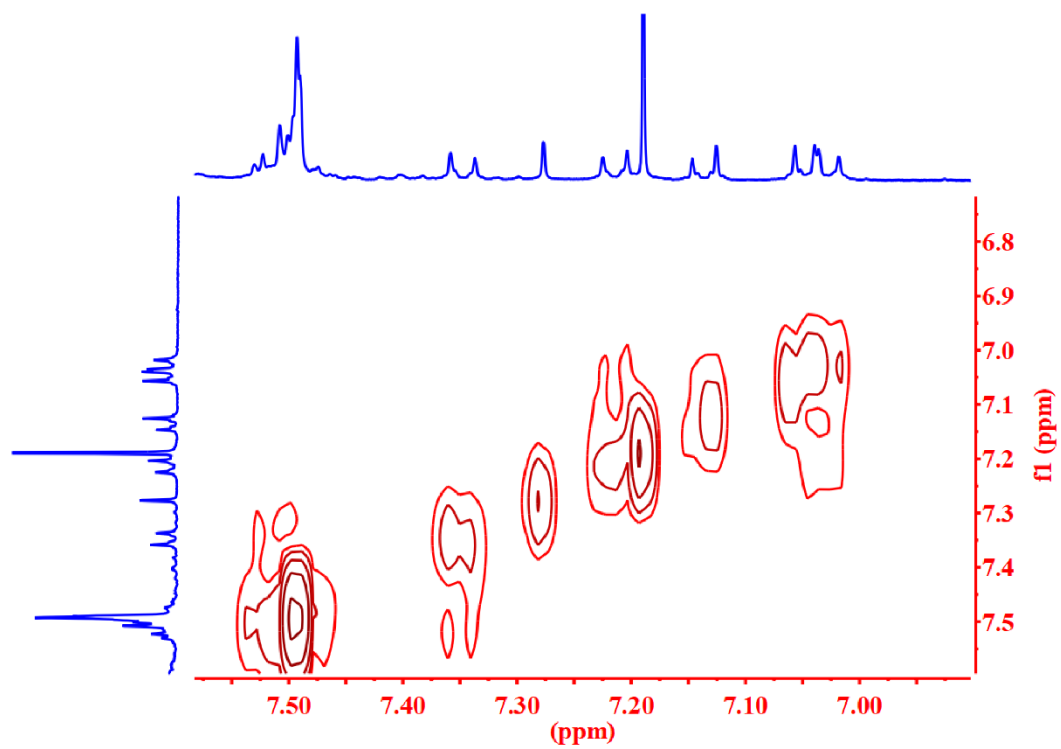

**Figure S22.** Expanded 2D  $^1\text{H}$ - $^1\text{H}$  COSY NMR spectrum (400 MHz,  $\text{CDCl}_3$ ) of compound **5**.

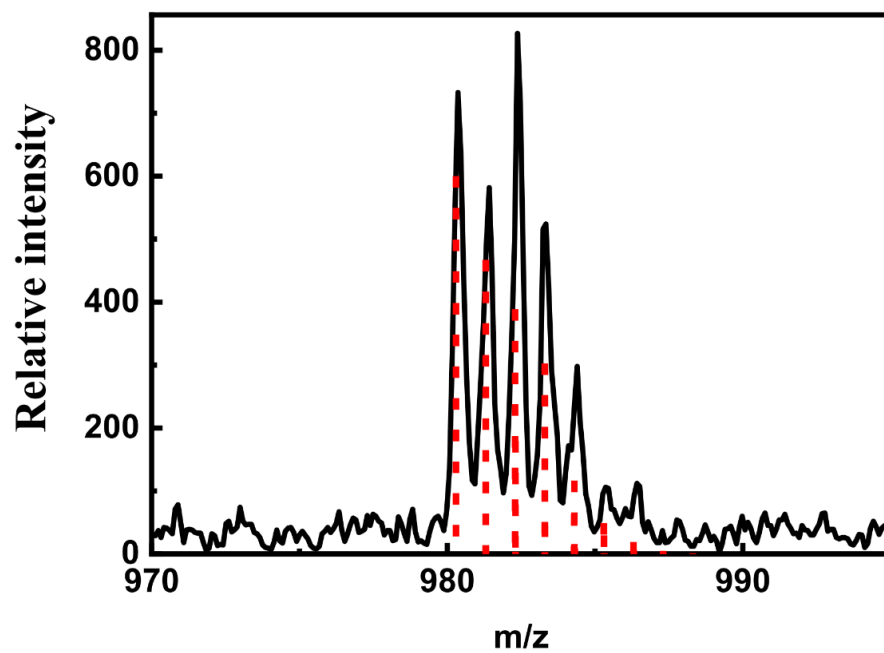

**Figure S23.** MALDI-TOF-MS spectrum (black) and simulated data (red) for compound **5**.



## References

- [S1] Huang, Q.; Zhang, M. M.; Wang, J. Y.; Wang, S. D.; Du, P.W. *J. Am. Chem. Soc.* **2019**, 141, 18938-18943.
- [S2] Huang, Q.; Zhuang, G. L.; Jia, H. X.; Qian, M. M.; Cui, S. S.; Yang, S. F.; Du, P. W. *Angew. Chem. Int. Ed.* **2019**, 58, 6244-6249.
- [S3] Black, C. B.; Andrioletti, B.; Try, A. C.; Ruiperez, C.; Sessler, J. L. *J. Am. Chem. Soc.* **1999**, 121, 10438-10439.
- [S4] Lu, D. P.; Zhuang, G. L.; Wu, H. T.; Wang, S.; Yang, S. F.; Du, P. W. *Angew. Chem. Int. Ed.* **2017**, 56, 158-162.
- [S5] Isobe, H.; Hitosugi, S.; Yamasaki, T.; Iizuka, R. *Chem. Sci.* **2013**, 4, 1293-1297.
- [S6] Thordarson, P. *Chem. Soc. Rev.* **2011**, 40, 5922-5923.
